# Supplementary material
Source: PubMed Central journal article supplement (PMC3543034)
Supplement: supp_M112.428573_jbc.M112.428573-1.pdf [file supp_M112.428573_jbc.M112.428573-1.pdf]

**Supplemental Table 1. Erythrocyte membrane peptides labeled by some (but not all) of the glycolytic enzymes derivatized with a photoactivatable cross-linking reagent.**

The first column shows the identified membrane protein. The second, third, fourth and fifth columns list the peptides tagged by GAPDH, aldolase, lactate dehydrogenase and pyruvate kinase, respectively. The number at the beginning and end of each peptide shows where the peptide is located in the protein sequence. The bold characters in larger font constitute the biotin tagged amino acids.

| Label recipient protein | Labeling enzyme                                                                                                                                                                                                                                                                                                                                                                                     |                                                                                                                                                                                                                     |                                                                                                                                                                                                                                                                                                    |                                                                                                                                                                                                                                                                                                     |
|-------------------------|-----------------------------------------------------------------------------------------------------------------------------------------------------------------------------------------------------------------------------------------------------------------------------------------------------------------------------------------------------------------------------------------------------|---------------------------------------------------------------------------------------------------------------------------------------------------------------------------------------------------------------------|----------------------------------------------------------------------------------------------------------------------------------------------------------------------------------------------------------------------------------------------------------------------------------------------------|-----------------------------------------------------------------------------------------------------------------------------------------------------------------------------------------------------------------------------------------------------------------------------------------------------|
|                         | GAPDH                                                                                                                                                                                                                                                                                                                                                                                               | aldolase                                                                                                                                                                                                            | LDH                                                                                                                                                                                                                                                                                                | PK                                                                                                                                                                                                                                                                                                  |
| <b>α- spectrin</b>      | <p>–</p> <p>–</p> <p><b>969 QAAPVEGVAGEQR 981</b></p> <p><b>1199IEKKCQ</b>ALSAADPGSDLF</p> <p>SVQALQR<b>1223</b></p> <p><b>1927 DYAFQEFNWK1936</b></p>                                                                                                                                                                                                                                              | <p><b>495QEAFLE</b>NEDLGNSLGSAAE</p> <p>ALLQK<b>517</b></p> <p><b>674EATKQKG</b>TQLHEANQQL</p> <p>QFENNAEDLQR<b>701</b></p> <p>–</p> <p>–</p> <p><b>1927 DYAFQEFNWK 1936</b></p>                                    | <p><b>495QEAFLE</b>NEDLGNSLGSAAE</p> <p>ALLQK <b>517</b></p> <p><b>674EATKQKG</b>TQLHEANQQL</p> <p>QFENNAEDLQR <b>701</b></p> <p><b>969 QAAPVEGVAGEQR981</b></p> <p><b>1199IEKKCQ</b>ALSAADPGSDL</p> <p>FSVQALQR <b>1223</b></p> <p>–</p>                                                          | <p><b>495QEAFLE</b>NEDLGNSLGSAAE</p> <p>ALLQK <b>517</b></p> <p><b>674EATKQKGTQL</b>HEANQQL</p> <p>QFENNAEDLQR <b>701</b></p> <p>–</p> <p><b>1199IEKKCQ</b>ALSAADPGSDL</p> <p>FSVQALQR <b>1223</b></p> <p><b>1927DYAFQEFNWK1936</b></p>                                                             |
| <b>β- spectrin</b>      | <p>–</p> <p><b>239NVAERQ</b>LGIIPLLDPEDVF</p> <p>TENPDEK<b>V</b>QQQLQAFSTYR</p> <p><b>264</b></p> <p><b>336GV</b>QQQLQAFSTYR<b>348</b></p> <p>–</p> <p><b>910 AA</b>NSLVESGHPR <b>921</b></p> <p><b>1163QEFQKDAKQAE</b>AILS<b>NQ</b></p> <p>EYTLAHLEPPDSLEAAEAGIR</p> <p><b>1200</b></p> <p><b>1226 LVAEGNLYSDK 1236_</b></p> <p>–</p> <p>–</p> <p><b>1285KLLTSQDVSYDEAR</b></p> <p><b>1298</b></p> | <p><b>192HVNVTNFTSSWK 203</b></p> <p>–</p> <p>–</p> <p><b>910 AA</b>NSLVESGHPR <b>921</b></p> <p><b>1163QEFQKDAKQAE</b>AILS<b>NQ</b></p> <p>EYTLAHLEPPDSLEAAEAGIR</p> <p><b>1200</b></p> <p>–</p> <p>–</p> <p>–</p> | <p>–</p> <p><b>239NVAERQ</b>LGIIPLLDPEDVF</p> <p>TENPDEK <b>264</b></p> <p>–</p> <p>–</p> <p>–</p> <p><b>1163QEFQKDAKQAE</b>AILS<b>NQ</b></p> <p>E<b>Y</b>TLAHLEPPDSLEAAEAGIR</p> <p><b>1200</b></p> <p>–</p> <p><b>1265EASV</b>LLLRDNLELQ<b>NFLQ</b></p> <p>NCQELTLWINDK <b>1293</b></p> <p>–</p> | <p><b>187TAGYPHVNVTNFTSSWKD</b></p> <p><b>GLAFN 209</b></p> <p><b>239NVAERQ</b>LGIIPLLDPEDVF</p> <p>TENPDEK<b>264</b></p> <p>–</p> <p><b>616EQCFEELS</b>NMAAGR<b>629</b></p> <p><b>910 AA</b>NSLVESGHPR<b>921</b></p> <p>–</p> <p>–</p> <p>–</p> <p>–</p> <p>–</p> <p><b>1293KLLTSQDVSYDEAR</b></p> |

|                   |                                                                                                                                                                                                                                                                                                                                |                                                                                                                                     |                                                                                                                                                                                                                                                                                                                                                                                                                                               |                                                                                                                                                                                                                                                                                                                      |
|-------------------|--------------------------------------------------------------------------------------------------------------------------------------------------------------------------------------------------------------------------------------------------------------------------------------------------------------------------------|-------------------------------------------------------------------------------------------------------------------------------------|-----------------------------------------------------------------------------------------------------------------------------------------------------------------------------------------------------------------------------------------------------------------------------------------------------------------------------------------------------------------------------------------------------------------------------------------------|----------------------------------------------------------------------------------------------------------------------------------------------------------------------------------------------------------------------------------------------------------------------------------------------------------------------|
|                   | -<br>-                                                                                                                                                                                                                                                                                                                         | -<br><b>1927 DYAFQEFNWK 1936</b>                                                                                                    | -                                                                                                                                                                                                                                                                                                                                                                                                                                             | <b>1306</b><br>-                                                                                                                                                                                                                                                                                                     |
| <b>Ankyrin</b>    | <b>134</b> GANQNVATEDGFTPLAV<br>ALQQGHENVVAHLINYGTK<br><b>169</b><br>-<br><b>493</b> NANPNLATTAGHTPLHIA<br><b>A512</b><br>-<br>-<br>-<br>-<br>-<br>-<br>-<br>-<br>-<br><b>1462</b> ANMENLYTALQSIDR<br><b>1476</b><br><b>1519</b> DELLSPASLGCALSSPLR<br><b>1536</b><br><b>1612</b> GPELGSLELVEDDTVDS<br><b>ATNGLIDLLEQ 1640</b> | -<br>-<br><b>493</b> NANPNLATTAGHTPLHIA<br><b>AR512</b><br>-<br>-<br>-<br>-<br>-<br>-<br>-<br><b>1464</b> MENLYTALQSIDR <b>1476</b> | -<br><b>211</b> HIAAHYENLNVAQLLLNR<br><b>228</b><br>-<br>-<br><b>809</b> TVEILDVSEDEGEELISFK<br><b>828</b><br><b>1029</b> LDQILNGMDEELGSLEEL<br>EK <b>1048</b><br><b>1127</b> TFSPIVTVEPR <b>1137</b><br><b>1172</b> LLCSVIGGTDQAQWEDI<br>TGTTK <b>1193</b><br><b>1386</b> YSILSESTPGSLSGTE<br><b>1401</b><br>-<br><b>1503</b> DYSLSPSQMNGYSSLQD<br>ELLSPASLGCALSSPLR <b>1536</b><br><b>1612</b> GPELGSLELVEDDTVDS<br>ATNGLIDLLEQ <b>1640</b> | -<br>-<br>-<br><b>599</b> AWN GYTPLHIAAK <b>611</b><br><b>630</b> SLLQYGGSSANAESVQGV<br>PLHLAA <b>643</b><br>-<br><b>1087</b> LVPLVQATFPENAVTKR<br><b>V1104</b><br>-<br>-<br>-<br>-<br><b>1508</b> PSQMNGYSSLQD <b>ELLS</b><br>PASLGCALSSPLR <b>1536</b><br><b>1612</b> GPELGSLELVEDDTVDS<br>ATNGLIDLLEQ <b>1640</b> |
| <b>Band 3</b>     | -                                                                                                                                                                                                                                                                                                                              | -                                                                                                                                   | -                                                                                                                                                                                                                                                                                                                                                                                                                                             | <b>312</b> GFLDCSLVLPPTDAPSEQA<br>LLSLVPVQR <b>340</b>                                                                                                                                                                                                                                                               |
| <b>α- adducin</b> | <b>623</b> VPEPTTGDDSDAATFKPTL                                                                                                                                                                                                                                                                                                 | -                                                                                                                                   | -                                                                                                                                                                                                                                                                                                                                                                                                                                             | -                                                                                                                                                                                                                                                                                                                    |

|                    |                                                                                                                            |                                                                                                                                                                                                                                                       |                                                                                                    |                                                                                                      |
|--------------------|----------------------------------------------------------------------------------------------------------------------------|-------------------------------------------------------------------------------------------------------------------------------------------------------------------------------------------------------------------------------------------------------|----------------------------------------------------------------------------------------------------|------------------------------------------------------------------------------------------------------|
|                    | PDLSPDEPSEALGFPMLEK <b>660</b>                                                                                             |                                                                                                                                                                                                                                                       |                                                                                                    |                                                                                                      |
| <b>Protein 4.1</b> | –<br><b>764</b> TITYEAAQTDDNSGDLDP<br>GVLL <b>785</b>                                                                      | –<br>–                                                                                                                                                                                                                                                | <b>212CKV</b> SLLDDTVYECVVEK<br><b>228</b><br>–                                                    | –<br>–                                                                                               |
| <b>ABCG2</b>       | –                                                                                                                          | –                                                                                                                                                                                                                                                     | <b>237T</b> IIFSIHQPR <b>246</b>                                                                   | –                                                                                                    |
| <b>p55</b>         | <b>396FIV</b> FIAPTDQGTQTEALQQ<br>LQK <b>417</b>                                                                           | <b>396FIV</b> FIAPTDQGTQTEALQQ<br>LQK <b>417</b>                                                                                                                                                                                                      | <b>114GDEI</b> LEINGTNVTNHSVD<br>QLQK <b>135</b>                                                   | <b>114GDEI</b> LEINGTNVTNHSVD<br>QLQK <b>135</b>                                                     |
| <b>PK</b>          | –                                                                                                                          | –                                                                                                                                                                                                                                                     | –                                                                                                  | <b>325I</b> CATQMLESMIK <b>336</b><br><b>88I</b> KNV <b>R</b> TATESFASDPILYRPV<br>AVALDTK <b>115</b> |
| <b>Glut 1</b>      | <b>314GI</b> VNTAFTVVSLFVVER-<br><b>330</b>                                                                                | –                                                                                                                                                                                                                                                     | –                                                                                                  | <b>314GI</b> VNT <b>A</b> FTVVSLFVVER<br><b>330</b>                                                  |
| <b>Rh</b>          | <b>236NA</b> VFNTYYAVAVSVVTAI<br>SGSSLAHPQR <b>263</b>                                                                     | <b>236NA</b> VFNTYYAVAVSVVTAIS<br><b>G</b> SSLAHPQR <b>263</b>                                                                                                                                                                                        | –                                                                                                  | –                                                                                                    |
| <b>Dematin</b>     | –                                                                                                                          | <b>318V</b> FAMSPPEEFGK <b>328</b>                                                                                                                                                                                                                    | –                                                                                                  | <b>318 V</b> FAMSPPEEFGK <b>328</b>                                                                  |
| <b>aldolase</b>    | <b>1MPYQ</b> YPALTPEQKKELSDIAH<br>R <b>22</b><br>–<br>–<br>–<br>–                                                          | –<br>–<br><b>116</b> GILAADESVGSM- <b>127</b><br><b>232C</b> QQ <b>NGI</b> VPIVEPEILPDG<br>DHDLK <b>254</b><br><b>274G</b> Q <b>SE</b> EEASINLNAINK <b>28</b><br><b>9</b><br><b>316PPA</b> V <b>T</b> GITFLSGGQ <b>S</b> EEEA<br>SINLNAINK <b>343</b> | <b>1MPYQ</b> YPALTPEQKKELSDIAH<br>R <b>22</b><br>–<br>–<br>–<br>–                                  | <b>1MPYQ</b> Y <b>P</b> ALTPEQKKELSDIA<br>HR <b>22</b><br>–<br>–<br>–<br>–                           |
| <b>GAPDH</b>       | <b>65GK</b> LIVINGNPITIFQER <b>80</b><br>–<br><b>125S</b> ADAPMFVMGVNHEK<br><b>139</b><br><b>152C</b> TNCLAPLAK <b>162</b> | –<br><b>82P</b> SKIK <b>W</b> GDAGA EYVVESTG<br>VFTTMEK <b>107</b><br>–<br>–                                                                                                                                                                          | <b>65GK</b> <b>L</b> VINGNPITIFQER <b>80</b><br>–<br><b>125S</b> ADAPMFVMGVNHEK<br><b>139</b><br>– | –<br>–<br>–<br>–                                                                                     |

|                 |                                                                                                |                                                                                                                                                                                                                    |                                                                                                                                                                                                                                                                                                                                                             |                                                                      |
|-----------------|------------------------------------------------------------------------------------------------|--------------------------------------------------------------------------------------------------------------------------------------------------------------------------------------------------------------------|-------------------------------------------------------------------------------------------------------------------------------------------------------------------------------------------------------------------------------------------------------------------------------------------------------------------------------------------------------------|----------------------------------------------------------------------|
|                 | <b>168FGIV</b> EGLMTTVHAITATQ<br>K <b>186</b><br><b>324V</b> VDLMAHMASK <b>334</b>             | —<br>—                                                                                                                                                                                                             | —<br><b>324V</b> VDLMAHMASK <b>334</b>                                                                                                                                                                                                                                                                                                                      | —<br>—                                                               |
| <b>LDH</b>      | —<br>—<br><b>115G</b> VVNI <sup>V</sup> PGFGPTAGAAIAS<br>HEDVDK <b>139</b><br>—<br>—<br>—<br>— | —<br>—<br>—<br>—<br>—<br>—<br>—                                                                                                                                                                                    | <b>43D</b> LADLALVDV <b>AL 55</b><br><b>58L</b> KGEMMDL <b>Q</b> HGSLFLR <b>73</b><br>—<br><b>133I</b> LVSNPVDILTYI <b>VW</b> <b>K</b><br><b>149</b><br><b>158V</b> IGSGCNLDSAR <b>169</b><br><b>184S</b> CHGW <b>VL</b> GEHGDSSVP<br>VWSGMNVAGVSLK <b>212</b><br><b>246G</b> YTSWAIGLSVAD <b>LA260</b><br><b>191G</b> EHGDSSVPVWSGMNV<br>AGVSLK <b>212</b> | —<br>—<br>—<br>—<br>—<br>—<br>—<br>—                                 |
| <b>Actin</b>    | —<br>—<br>—                                                                                    | <b>144A</b> SGR <b>TT</b> GIVMDSGDGVT<br>HTVPIYEGYALPHAILR <b>177</b><br><b>121Q</b> IMFETFNT <b>TG</b> IVMDSGD<br>GVTHTVPIYEGYALPHAILR<br><b>158</b><br><b>263Q</b> PSFLGM <b>E</b> SCGIHETTFNS<br>IMK <b>284</b> | —<br><b>121Q</b> IMFETF <b>N</b> TT <b>G</b> IVMDSGD<br>GVTH <b>T</b> VPIYEGYALPHAILR<br><b>158</b><br>—<br>—                                                                                                                                                                                                                                               | —<br>—<br>—<br><b>295A</b> N <b>T</b> VLSSGGTTMYPGIADR<br><b>312</b> |
| <b>Stomatin</b> | —                                                                                              | —                                                                                                                                                                                                                  | <b>221V</b> IAAEGEMNASR <b>232</b>                                                                                                                                                                                                                                                                                                                          | —                                                                    |
| <b>α-Hb</b>     | —                                                                                              | <b>45H</b> FDLSHGSAQVK <b>56</b>                                                                                                                                                                                   | —                                                                                                                                                                                                                                                                                                                                                           | <b>45 H</b> FDLSHGSAQVK <b>56</b>                                    |
| <b>Rap 1b</b>   | —                                                                                              | —                                                                                                                                                                                                                  | —                                                                                                                                                                                                                                                                                                                                                           | <b>151 K</b> INVNEIFYDLVR <b>163</b>                                 |
| <b>SUMO4</b>    | —                                                                                              | —                                                                                                                                                                                                                  | <b>12 T</b> ENNNHINLK <b>21</b>                                                                                                                                                                                                                                                                                                                             | —                                                                    |
